# Supplementary material for: q-Rung orthopair fuzzy hypersoft ordered aggregation operators and their application towards green supplier
Source: Frontiers journal article supplement (doi:10.3389/fenvs.2022.1048019), 2023-02-01
Supplement: Data_Sheet_1.PDF [file Data_Sheet_1.PDF]

$$(H, A) = \begin{bmatrix} (0.88, 0.99) & (0.77, 0.99) & (0.99, 0.33) & (0.77, 0.66) \\ (0.55, 0.99) & (0.99, 0.44) & (0.77, 0.99) & (0.66, 0.99) \\ (0.77, 0.88) & (0.77, 0.99) & (0.55, 0.66) & (0.99, 0.44) \\ (0.55, 0.88) & (0.88, 0.55) & (0.66, 0.88) & (0.77, 0.88) \end{bmatrix}$$

To obtain the order position of a matrix:

$$(H, A) = \begin{bmatrix} (0.99, 0.33) & (0.88, 0.99) & (0.77, 0.99) & (0.77, 0.66) \\ (0.99, 0.44) & (0.77, 0.99) & (0.66, 0.99) & (0.55, 0.99) \\ (0.99, 0.44) & (0.77, 0.99) & (0.77, 0.88) & (0.55, 0.66) \\ (0.88, 0.55) & (0.77, 0.88) & (0.66, 0.88) & (0.55, 0.88) \end{bmatrix}$$

Decision matrix for Alternative P<sub>1</sub>

$$\begin{bmatrix} (0.66, 0.99) & (0.77, 0.99) & (0.99, 0.33) & (0.77, 0.66) & (0.88, 0.99) & (0.77, 0.99) & (0.99, 0.33) & (0.77, 0.99) \\ (0.55, 0.66) & (0.99, 0.44) & (0.55, 0.99) & (0.66, 0.99) & (0.66, 0.99) & (0.66, 0.88) & (0.77, 0.66) & (0.88, 0.66) \\ (0.44, 0.88) & (0.77, 0.99) & (0.44, 0.66) & (0.99, 0.44) & (0.77, 0.88) & (0.77, 0.55) & (0.88, 0.33) & (0.77, 0.44) \\ (0.55, 0.44) & (0.88, 0.55) & (0.66, 0.88) & (0.77, 0.88) & (0.88, 0.66) & (0.77, 0.66) & (0.99, 0.55) & (0.55, 0.66) \end{bmatrix}$$

Decision matrix for Alternative P<sub>2</sub>

$$\begin{bmatrix} (0.55, 0.66) & (0.44, 0.99) & (0.88, 0.33) & (0.77, 0.66) & (0.44, 0.99) & (0.77, 0.55) & (0.99, 0.66) & (0.77, 0.99) \\ (0.77, 0.88) & (0.77, 0.99) & (0.44, 0.66) & (0.99, 0.44) & (0.77, 0.44) & (0.77, 0.55) & (0.88, 0.33) & (0.88, 0.44) \\ (0.88, 0.99) & (0.77, 0.99) & (0.99, 0.44) & (0.77, 0.66) & (0.88, 0.66) & (0.77, 0.99) & (0.99, 0.44) & (0.77, 0.99) \\ (0.55, 0.66) & (0.99, 0.44) & (0.33, 0.99) & (0.66, 0.99) & (0.44, 0.99) & (0.33, 0.88) & (0.77, 0.66) & (0.88, 0.66) \end{bmatrix}$$

Decision matrix for Alternative P<sub>3</sub>

$$\begin{bmatrix} (0.99, 0.66) & (0.44, 0.99) & (0.88, 0.33) & (0.77, 0.66) & (0.44, 0.99) & (0.77, 0.55) & (0.99, 0.66) & (0.77, 0.99) \\ (0.44, 0.88) & (0.77, 0.66) & (0.55, 0.88) & (0.99, 0.33) & (0.66, 0.44) & (0.77, 0.66) & (0.55, 0.33) & (0.88, 0.77) \\ (0.66, 0.99) & (0.77, 0.99) & (0.99, 0.44) & (0.77, 0.66) & (0.88, 0.66) & (0.77, 0.99) & (0.99, 0.44) & (0.77, 0.99) \\ (0.33, 0.88) & (0.77, 0.99) & (0.44, 0.66) & (0.99, 0.44) & (0.77, 0.44) & (0.77, 0.55) & (0.88, 0.33) & (0.88, 0.44) \end{bmatrix}$$

Decision matrix for Alternative P<sub>4</sub>

$$\begin{bmatrix} (0.99, 0.44) & (0.99, 0.44) & (0.99, 0.33) & (0.77, 0.99) & (0.77, 0.55) & (0.77, 0.44) & (0.44, 0.66) & (0.33, 0.88) \\ (0.88, 0.33) & (0.88, 0.77) & (0.77, 0.66) & (0.77, 0.66) & (0.66, 0.44) & (0.55, 0.88) & (0.55, 0.33) & (0.44, 0.88) \\ (0.99, 0.44) & (0.99, 0.44) & (0.88, 0.66) & (0.77, 0.99) & (0.77, 0.99) & (0.77, 0.99) & (0.77, 0.66) & (0.66, 0.99) \\ (0.99, 0.66) & (0.99, 0.66) & (0.88, 0.33) & (0.77, 0.99) & (0.77, 0.66) & (0.77, 0.55) & (0.44, 0.99) & (0.44, 0.99) \end{bmatrix}$$

The decision matrices with ordered position as follows:

Decision matrix for Alternative P<sub>1</sub>

$$\begin{bmatrix} (0.99, 0.33) & (0.99, 0.33) & (0.88, 0.99) & (0.77, 0.99) & (0.77, 0.99) & (0.77, 0.99) & (0.77, 0.66) & (0.66, 0.99) \\ (0.99, 0.44) & (0.88, 0.66) & (0.77, 0.66) & (0.66, 0.99) & (0.66, 0.99) & (0.66, 0.88) & (0.55, 0.99) & (0.55, 0.66) \\ (0.99, 0.44) & (0.88, 0.33) & (0.77, 0.99) & (0.77, 0.88) & (0.77, 0.55) & (0.77, 0.44) & (0.44, 0.88) & (0.44, 0.66) \\ (0.99, 0.55) & (0.88, 0.66) & (0.88, 0.55) & (0.77, 0.88) & (0.77, 0.66) & (0.66, 0.88) & (0.55, 0.66) & (0.55, 0.44) \end{bmatrix}$$

---

Decision matrix for Alternative P<sub>2</sub>

$$\begin{bmatrix} (0.99, 0.66) & (0.88, 0.33) & (0.77, 0.99) & (0.77, 0.66) & (0.77, 0.55) & (0.55, 0.66) & (0.44, 0.99) & (0.44, 0.99) \\ (0.99, 0.44) & (0.88, 0.44) & (0.88, 0.33) & (0.77, 0.99) & (0.77, 0.88) & (0.77, 0.55) & (0.77, 0.33) & (0.44, 0.66) \\ (0.99, 0.44) & (0.99, 0.44) & (0.88, 0.99) & (0.88, 0.66) & (0.77, 0.99) & (0.77, 0.99) & (0.77, 0.99) & (0.77, 0.66) \\ (0.99, 0.44) & (0.88, 0.66) & (0.77, 0.66) & (0.66, 0.99) & (0.55, 0.66) & (0.44, 0.99) & (0.33, 0.99) & (0.33, 0.88) \end{bmatrix}$$

Decision matrix for Alternative P<sub>3</sub>

$$\begin{bmatrix} (0.99, 0.66) & (0.99, 0.66) & (0.88, 0.33) & (0.77, 0.99) & (0.77, 0.66) & (0.77, 0.55) & (0.44, 0.99) & (0.44, 0.99) \\ (0.99, 0.33) & (0.88, 0.77) & (0.77, 0.66) & (0.77, 0.66) & (0.66, 0.44) & (0.55, 0.88) & (0.55, 0.33) & (0.44, 0.88) \\ (0.99, 0.44) & (0.99, 0.44) & (0.88, 0.66) & (0.77, 0.99) & (0.77, 0.99) & (0.77, 0.99) & (0.77, 0.66) & (0.66, 0.99) \\ (0.99, 0.44) & (0.88, 0.44) & (0.88, 0.33) & (0.77, 0.99) & (0.77, 0.55) & (0.77, 0.44) & (0.44, 0.66) & (0.33, 0.88) \end{bmatrix}$$

Decision matrix for Alternative P<sub>4</sub>

$$\begin{bmatrix} (0.99, 0.44) & (0.99, 0.44) & (0.99, 0.33) & (0.77, 0.99) & (0.77, 0.55) & (0.77, 0.44) & (0.44, 0.66) & (0.33, 0.88) \\ (0.88, 0.33) & (0.88, 0.77) & (0.77, 0.66) & (0.77, 0.66) & (0.66, 0.44) & (0.55, 0.88) & (0.55, 0.33) & (0.44, 0.88) \\ (0.99, 0.44) & (0.99, 0.44) & (0.88, 0.66) & (0.77, 0.99) & (0.77, 0.99) & (0.77, 0.99) & (0.77, 0.66) & (0.66, 0.99) \\ (0.99, 0.66) & (0.99, 0.66) & (0.88, 0.33) & (0.77, 0.99) & (0.77, 0.66) & (0.77, 0.55) & (0.44, 0.99) & (0.44, 0.99) \end{bmatrix}$$
